# Supplementary material for: Geostationary Environment Monitoring Spectrometer (GEMS) polarization characteristics and correction algorithm
Source: Copernicus journal article supplement (doi:10.5194/amt-2023-92), 2023-05-10
Supplement: Supplementary file 1 [file amt-2023-92-supplement.pdf]

*Supplement of*

## **Geostationary Environment Monitoring Spectrometer (GEMS) polarization characteristics and correction algorithm**

5 Haklim Choi <sup>1,a</sup>, Xiong Liu <sup>2</sup>, Ukkyo Jeong <sup>3,\*</sup>, Heesung Chong <sup>4,b</sup>, Jhoon Kim <sup>4</sup>, Myung Hwan Ahn <sup>5</sup>,  
Dai Ho Ko <sup>6</sup>, Dong-won Lee <sup>7</sup>, Kyung-Jung Moon <sup>7</sup>, and Kwang-Mog Lee <sup>1,\*</sup>

<sup>1</sup>Department of Astronomy and Atmospheric Sciences, Kyungpook National University, Daegu, Republic of Korea

<sup>2</sup>Center for Astrophysics | Harvard & Smithsonian, Cambridge, MA, USA

10 <sup>3</sup>Division of Earth Environmental System Science, Major of Spatial Information Engineering, Pukyong National University,  
Busan, Republic of Korea

<sup>4</sup>Department of Atmospheric Sciences, Yonsei University, Seoul, Republic of Korea

<sup>5</sup>Department of Climate and Energy Systems Engineering, Ewha Womans University, Seoul, Korea`

<sup>6</sup>Korea Aerospace Research Institute, Daejeon, Korea

15 <sup>7</sup>National Institute of Environmental Research, Environmental Satellite Center, Incheon, Republic of Korea

<sup>a</sup>now at: Kyungpook Institute of Oceanography, Kyungpook National University

<sup>b</sup>now at: Center for Astrophysics | Harvard & Smithsonian

*Correspondence to:* Kwang-Mog Lee ([kmlee@knu.ac.kr](mailto:kmlee@knu.ac.kr)) and Ukkyo Jeong ([ukkyo.jeong@pknu.ac.kr](mailto:ukkyo.jeong@pknu.ac.kr))

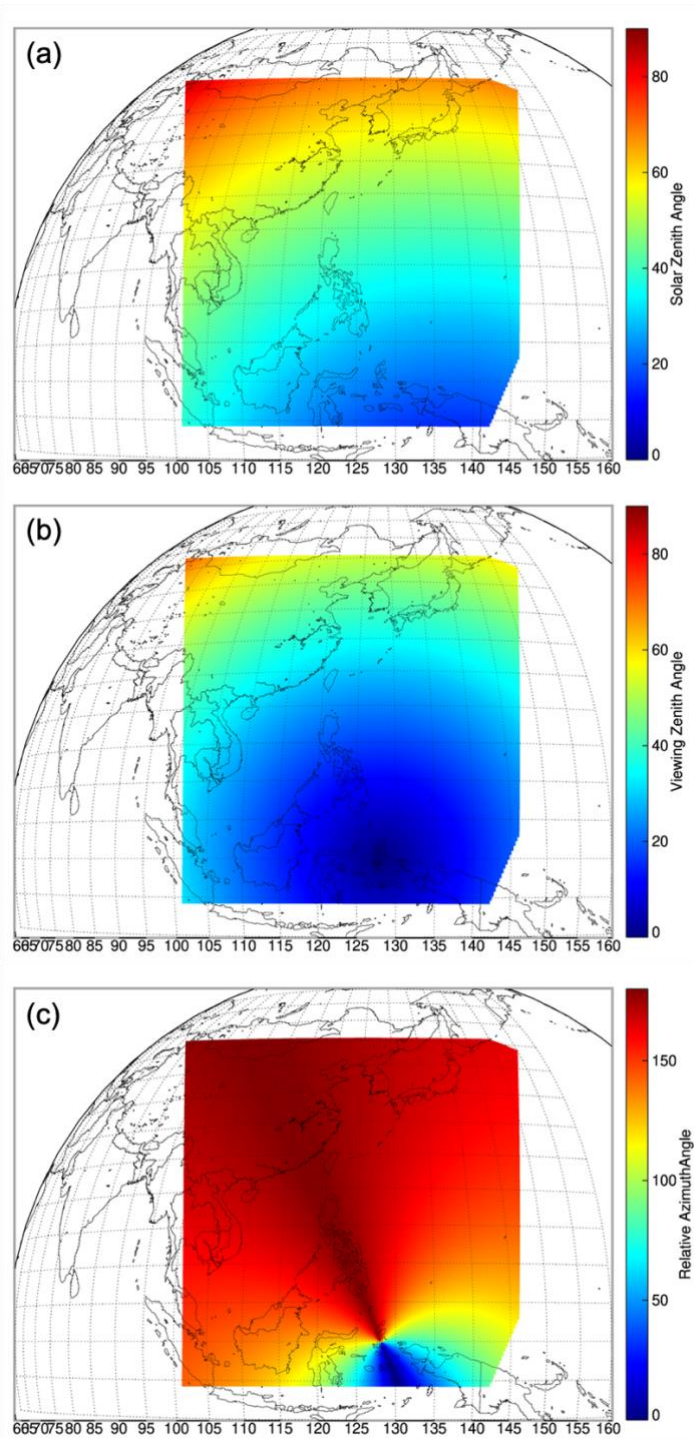

**Figure S1: The satellite-sun geometry for (a) solar zenith angle (SZA), viewing zenith angle (VZA), and relative azimuth angle (RAA) to simulate the synthetic data. The synthetic data was simulated for the January 15, 2016 at 03:00 UTC.**

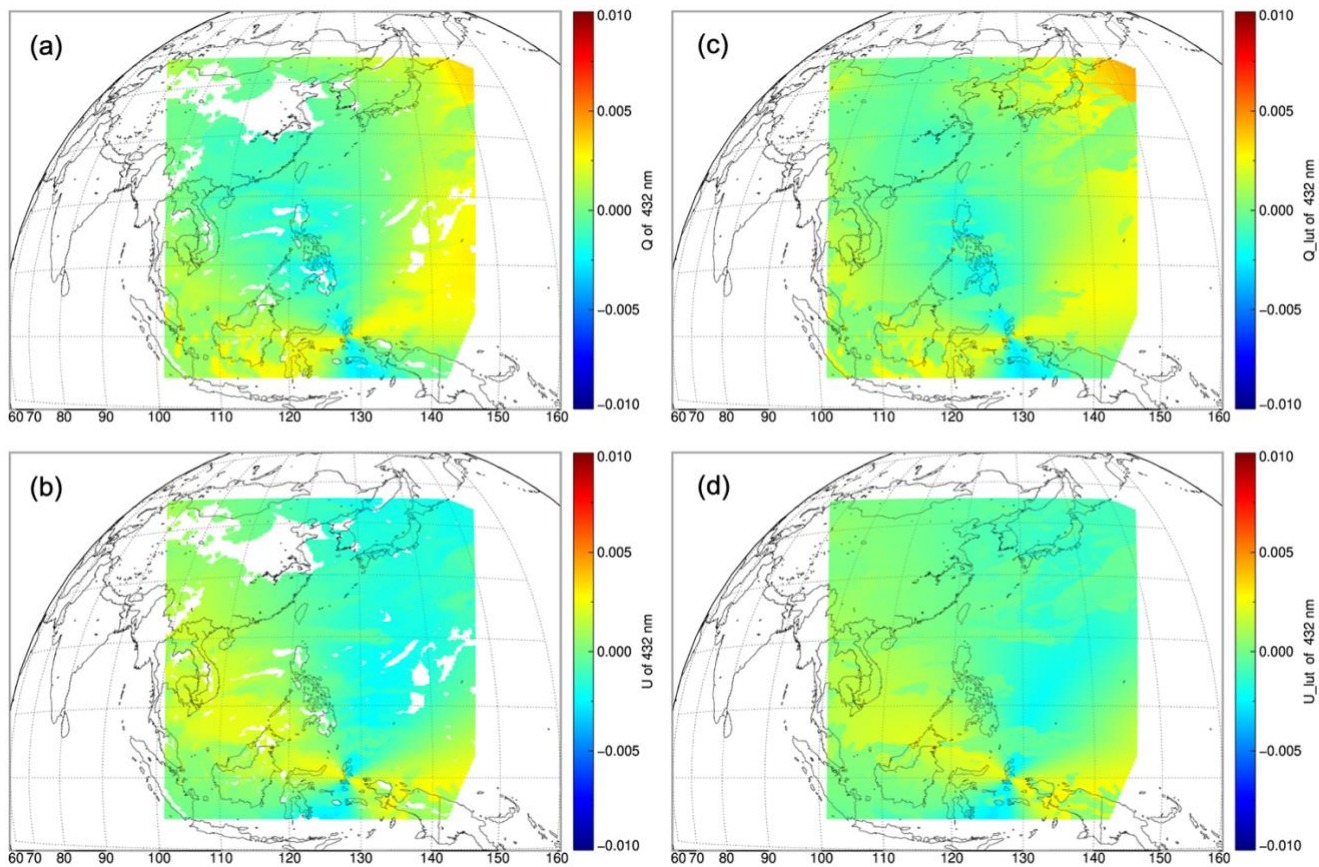

25

**Figure S2: Comparison of spatial distributions of Q and U at 432 nm (a, b) simulated by a radiative transfer model (RTM) for synthetic data with those (c, d) estimated based on look-up tables (LUTs) as described in the main manuscript.**
